# Supplementary material for: Comparison of the Basal Cell Carcinoma (BCC) Tumour Microenvironment to Other Solid Malignancies
Source: MDPI journal article supplement (doi:10.3390/cancers15010305), 2023-01-02
Supplement: s1 [file s1]

**Supplementary Table S1.** Summary of all significant and top three (if available, in bold) closest BCC “relatives” by cell type.

| Cell Type         | BCC score<br>(median), Q1,<br>Q3           | BCC- “Relatives” score<br>(median) | Q1                 | Q3                 | P-value        |
|-------------------|--------------------------------------------|------------------------------------|--------------------|--------------------|----------------|
| Th2               | 4.188E-18, 0,<br>0.01980129                | <b>PRAD = 1.07E-17</b>             | <b>0</b>           | <b>0.01706565</b>  | <b>0.6102</b>  |
|                   |                                            | <b>KICH = 0.001056705</b>          | <b>0</b>           | <b>0.007381045</b> | <b>0.151</b>   |
|                   |                                            | <b>KIRC = 2.23E-17</b>             | <b>0</b>           | <b>0.03051409</b>  | <b>0.1368</b>  |
| MSC               | 0.188433346,<br>0.08336783,<br>0.28205374  | <b>SKCM = 0.16096867</b>           | <b>0.07202425</b>  | <b>0.25446426</b>  | <b>0.3872</b>  |
| Total CD8+        | 0.00445073, 0,<br>0.043739228              | <b>GBM = 0.01048155</b>            | <b>0</b>           | <b>0.03021879</b>  | <b>0.2741</b>  |
|                   |                                            | <b>LGG = 0</b>                     | <b>0</b>           | <b>0.01996548</b>  | <b>0.05719</b> |
| Tgd               | 0, 0, 0.008231755                          | <b>THCA = 0</b>                    | <b>0</b>           | <b>0.008063912</b> | <b>0.7752</b>  |
|                   |                                            | <b>CHOL = 0</b>                    | <b>0</b>           | <b>0.01282003</b>  | <b>0.6099</b>  |
|                   |                                            | <b>LIHC = 0</b>                    | <b>0</b>           | <b>0.006720286</b> | <b>0.5979</b>  |
|                   |                                            | KICH = 0                           | 0                  | 0.009986598        | 0.5525         |
|                   |                                            | TGCT = 0                           | 0                  | 0.003538575        | 0.3495         |
|                   |                                            | GBM = 0                            | 0                  | 0.001140639        | 0.244          |
|                   |                                            | KIRC = 0                           | 0                  | 0.002117059        | 0.2002         |
|                   |                                            | DLBC = 0                           | 0                  | 0.01388940         | 0.08334        |
|                   |                                            | SARC = 0                           | 0                  | 0.002129824        | 0.07291        |
| B-cells           | 0.04857795,<br>0.020757612,<br>0.086950544 | <b>THYM = 0.055183104</b>          | <b>0.03108108</b>  | <b>0.08455359</b>  | <b>0.3715</b>  |
|                   |                                            | <b>GBM = 0.04815724</b>            | <b>0.028318876</b> | <b>0.075344991</b> | <b>0.2374</b>  |
|                   |                                            |                                    |                    |                    |                |
| Total Lymphocytes | 0.39140159,<br>0.3132104,<br>0.4688854     | <b>SARC = 0.416998654</b>          | <b>0.3124302</b>   | <b>0.5153758</b>   | <b>0.2290</b>  |
| Macrophages       | 0.25033106,<br>0.1763854,<br>0.3784326     | <b>ESCA = 0.2331247</b>            | <b>0.1675734</b>   | <b>0.3352133</b>   | <b>0.5397</b>  |
|                   |                                            | <b>KICH = 0.276729</b>             | <b>0.1843325</b>   | <b>0.3949821</b>   | <b>0.4904</b>  |
|                   |                                            | <b>BLCA = 0.2590653</b>            | <b>0.16693727</b>  | <b>0.33762817</b>  | <b>0.3333</b>  |
|                   |                                            | ACC = 0.2594566                    | 0.2071582          | 0.3565666          | 0.3128         |
|                   |                                            | STAD = 0.2654186                   | 0.19623848         | 0.33075342         | 0.2366         |
|                   |                                            | HNSC = 0.2748354                   | 0.2069556          | 0.3561280          | 0.2252         |
| Total NK          | 0.0325587,<br>0.005046464,<br>0.053041073  | DLBC = 0.2793964                   | 0.18870890         | 0.33007984         | 0.08976        |
|                   |                                            | <b>THYM = 0.02682497</b>           | <b>0.009408674</b> | <b>0.049124771</b> | <b>0.6696</b>  |
|                   |                                            | <b>ESCA = 0.02523973</b>           | <b>0.01152386</b>  | <b>0.04604726</b>  | <b>0.4214</b>  |
|                   |                                            | <b>KIRP = 0.02878749</b>           | <b>0.01382830</b>  | <b>0.04874396</b>  | <b>0.3381</b>  |
|                   |                                            | UVM = 0.02839242                   | 0.01406619         | 0.04997250         | 0.25           |
|                   |                                            | READ = 0.02042911                  | 0.003387114        | 0.041380355        | 0.2457         |
|                   |                                            | UCS = 0.0360689                    | 0.01366458         | 0.07025842         | 0.2434         |
|                   |                                            | KIRC = 0.03447636                  | 0.01423560         | 0.05709336         | 0.2311         |
|                   |                                            | SARC = 0.02980665                  | 0.01438558         | 0.04549609         | 0.1979         |
|                   |                                            | BLCA = 0.03280019                  | 0.01570095         | 0.05698518         | 0.1718         |
|                   |                                            | DLBC = 0.01879405                  | 0.004128464        | 0.042910416        | 0.1221         |

|            |                                        |                   |             |             |         |
|------------|----------------------------------------|-------------------|-------------|-------------|---------|
|            |                                        | PRAD = 0.03551566 | 0.01577075  | 0.05472112  | 0.09082 |
|            |                                        | LUSC = 0.02415559 | 0.01062867  | 0.03874510  | 0.07355 |
|            |                                        | CHOL = 0.04473911 | 0.02815367  | 0.06960667  | 0.05944 |
|            |                                        | COAD = 0.02242313 | 0.006309632 | 0.041589770 | 0.05544 |
|            |                                        | THCA = 0.03297953 | 0.01616638  | 0.05686914  | 0.0512  |
|            |                                        | SKCM = 0.02038228 | 0.006983169 | 0.040457560 | 0.05057 |
| Tregs      | 0, 0, 0                                | ACC = 0           | 0           | 0           | 0.9991  |
|            |                                        | LAML = 0          | 0           | 0.00315034  | 0.3533  |
| Total CD4+ | 0.15296126,<br>0.1031139,<br>0.2082608 | CHOL = 0.156189   | 0.1321129   | 0.1952696   | 0.6959  |
|            |                                        | SARC = 0.1562586  | 0.1154291   | 0.2083701   | 0.6334  |
|            |                                        | SKCM = 1412604    | 0.08728384  | 0.19168763  | 0.5715  |
|            |                                        | UCS = 0.145859    | 0.08257441  | 0.22042976  | 0.5447  |
|            |                                        | THCA = 0.1411155  | 0.1003041   | 0.1867856   | 0.4649  |
|            |                                        | LIHC = 0.1652248  | 0.1152202   | 0.2237863   | 0.4642  |
|            |                                        | BLCA = 0.1649314  | 0.09478596  | 0.23077402  | 0.2715  |
|            |                                        | MESO = 0.1472571  | 0.11229869  | 0.18824632  | 0.2135  |
|            |                                        | CESC = 0.1667974  | 0.1167771   | 0.2087164   | 0.2112  |
|            |                                        | KICH = 0.1782413  | 0.12870279  | 0.22144281  | 0.17    |
|            |                                        | PAAD = 0.1700216  | 0.12820877  | 0.21796094  | 0.1254  |
|            |                                        | TGCT = 0.1730064  | 0.1346265   | 0.2090150   | 0.08706 |
|            |                                        | PCPG = 0.175342   | 0.13049092  | 0.23039868  | 0.08318 |
